# Supplementary material for: On the stability of lithocholate derivative supramolecular tubules
Source: Royal Society of Chemistry journal article supplement (doi:10.1039/c6ra26092f), 2017-01-01
Supplement: c6ra26092f1.pdf [file c6ra26092f1.pdf]

Supporting Information for

# On the Stability of a Lithocholate Derivative Supramolecular Tubule

*M. Gubitosi,<sup>a,b</sup> A. D'Annibale,<sup>a</sup> K. Schillén,<sup>b</sup> U. Olsson,<sup>b</sup> N. V. Pavel<sup>a</sup> and L. Galantini<sup>a</sup>*

<sup>a</sup> Department of Chemistry, "Sapienza" University of Rome, P.le Aldo Moro 5, 00185 Rome, Italy

<sup>b</sup> Division of Physical Chemistry, Department of Chemistry, Lund University, SE-221 00 Lund,  
Sweden

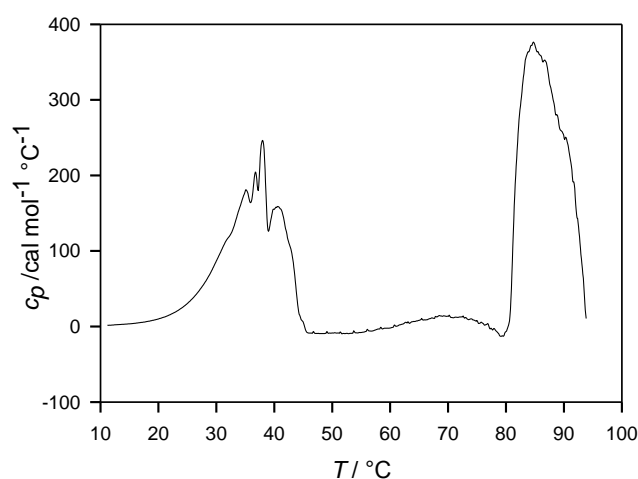

**Figure S1.** DSC thermogram of a 10.0 mM NaLC sample (aqueous NaOH solution at pH 12.0). Up-scan obtained with a scan rate of 60  $^\circ\text{C}/\text{h}$ . A broad endothermic peak in the range 20-40  $^\circ\text{C}$  is related to the transition from a nematic phase to a micelle solution, highlighting the presence of a Krafft temperature. A second peak at 80-90  $^\circ\text{C}$  could be related to the presence of a cloud point, since phase separation occurs.
